# Supplementary material
Source: HighWire-hosted journal article supplement (https://cmajopen.ca/highwire/filestream/84929/field_highwire_adjunct_files/2/2020-0140-meta-epidemiological-checklist.pdf)
Supplement: 2020-0140-meta-epidemiological-checklist.pdf [file 2020-0140-meta-epidemiological-checklist.pdf]

Table #. Meta-epidemiological study items checklist

| Section/Topic       | Item in research                                                                                                                                                                                                                                                                                                                                                                                                                                                 | Complete – Page Number                                                                                           |
|---------------------|------------------------------------------------------------------------------------------------------------------------------------------------------------------------------------------------------------------------------------------------------------------------------------------------------------------------------------------------------------------------------------------------------------------------------------------------------------------|------------------------------------------------------------------------------------------------------------------|
| <b>Title</b>        |                                                                                                                                                                                                                                                                                                                                                                                                                                                                  |                                                                                                                  |
|                     | Title Identify the report as a meta-epidemiologic study                                                                                                                                                                                                                                                                                                                                                                                                          | Yes No N/A - Page 1<br><input checked="" type="checkbox"/> <input type="checkbox"/> <input type="checkbox"/>     |
| <b>Abstract</b>     |                                                                                                                                                                                                                                                                                                                                                                                                                                                                  |                                                                                                                  |
|                     | Structured Summary Provide a structured summary that includes the background of the topic, goal of the study, data sources, method of data selection, appraisal and synthesis methods, results, limitations, conclusions and implications of key findings                                                                                                                                                                                                        | Yes No N/A - Page 3<br><input checked="" type="checkbox"/> <input type="checkbox"/> <input type="checkbox"/>     |
| <b>Introduction</b> |                                                                                                                                                                                                                                                                                                                                                                                                                                                                  |                                                                                                                  |
|                     | Rationale Describe the rationale for the meta-epidemiological study in the context of what is already known                                                                                                                                                                                                                                                                                                                                                      | Yes No N/A - Page 4<br><input checked="" type="checkbox"/> <input type="checkbox"/> <input type="checkbox"/>     |
|                     | Objectives Provide an explicit statement of the goal of the meta-epidemiological study and the hypothesis being empirically tested                                                                                                                                                                                                                                                                                                                               | Yes No N/A - Page 4<br><input checked="" type="checkbox"/> <input type="checkbox"/> <input type="checkbox"/>     |
| <b>Methods</b>      |                                                                                                                                                                                                                                                                                                                                                                                                                                                                  |                                                                                                                  |
|                     | Protocol Indicate if a protocol exists, if and where it can be accessed (eg, Web address). Registration of a protocol is not mandatory                                                                                                                                                                                                                                                                                                                           | Yes No N/A - Page<br><input type="checkbox"/> <input type="checkbox"/> <input checked="" type="checkbox"/>       |
|                     | Eligibility Criteria Specify study characteristics used as criteria for eligibility with a rationale                                                                                                                                                                                                                                                                                                                                                             | Yes No N/A - Page 6<br><input checked="" type="checkbox"/> <input type="checkbox"/> <input type="checkbox"/>     |
|                     | Information Sources Describe all information sources (eg, databases with dates of coverage, contact with experts to identify additional studies, Internet searches) and search date                                                                                                                                                                                                                                                                              | Yes No N/A - Page 9<br><input checked="" type="checkbox"/> <input type="checkbox"/> <input type="checkbox"/>     |
|                     | Search Present full electronic search strategy for at least one database, including any limits used, such that it could be repeated. Search is commonly not driven by a clinical question                                                                                                                                                                                                                                                                        | Yes No N/A - Supplement<br><input checked="" type="checkbox"/> <input type="checkbox"/> <input type="checkbox"/> |
|                     | Study Selection Describe the process for selecting studies for inclusion (ie, how many reviewers selected studies, reviewing in duplicate or by single individuals)                                                                                                                                                                                                                                                                                              | Yes No N/A - Page 7<br><input checked="" type="checkbox"/> <input type="checkbox"/> <input type="checkbox"/>     |
|                     | Data Collection Process Describe method of data extraction from reports (eg, piloted forms, independently, in duplicate) and any processes used for manipulating data or obtaining and confirming data from investigators                                                                                                                                                                                                                                        | Yes No N/A - Page 8<br><input checked="" type="checkbox"/> <input type="checkbox"/> <input type="checkbox"/>     |
|                     | Data Items List and define all variables for which data were sought and any assumptions and imputations made                                                                                                                                                                                                                                                                                                                                                     | Yes No N/A - Page 9<br><input checked="" type="checkbox"/> <input type="checkbox"/> <input type="checkbox"/>     |
|                     | Risk of bias in individual studies If risk of bias assessment of individual studies was relevant to the analysis, describe the items used and how this information is to be used during data synthesis                                                                                                                                                                                                                                                           | Yes No N/A<br><input type="checkbox"/> <input type="checkbox"/> <input checked="" type="checkbox"/>              |
|                     | Summary measures State the principal summary measures (eg, ratio of risk ratios, difference in means) and explain its meaning and direction to readers                                                                                                                                                                                                                                                                                                           | Yes No N/A - Page 9<br><input checked="" type="checkbox"/> <input type="checkbox"/> <input type="checkbox"/>     |
|                     | Synthesis of results Describe the statistical or descriptive methods of synthesis including measures of consistency if relevant. If applicable, describe the development of statistical or simulation modelling based on theoretical background. Describe and justify assumptions and computational approximations. Describe methods of additional analyses (eg, sensitivity or subgroup analyses, meta-regression), if done, indicating which were prespecified | Yes No N/A - Page 10<br><input checked="" type="checkbox"/> <input type="checkbox"/> <input type="checkbox"/>    |
| <b>Results</b>      |                                                                                                                                                                                                                                                                                                                                                                                                                                                                  |                                                                                                                  |
|                     | Study selection Give numbers of studies assessed for eligibility and included in the study, with reasons for exclusions at each stage, ideally with a flow diagram. Present a                                                                                                                                                                                                                                                                                    | Yes No N/A - Page 11<br><input checked="" type="checkbox"/> <input type="checkbox"/> <input type="checkbox"/>    |

|                               |                                                                                                                                                                                                                     |                                     |                          |                                     |              |
|-------------------------------|---------------------------------------------------------------------------------------------------------------------------------------------------------------------------------------------------------------------|-------------------------------------|--------------------------|-------------------------------------|--------------|
|                               | measure of inter-reviewer agreement (eg, kappa statistic)                                                                                                                                                           |                                     |                          |                                     |              |
| Study characteristics         | For each study, present characteristics for which data were extracted and provide the citations. Clinical characteristics may not always be relevant                                                                | Yes                                 | No                       | N/A                                 | - Page 11    |
|                               |                                                                                                                                                                                                                     | <input checked="" type="checkbox"/> | <input type="checkbox"/> | <input type="checkbox"/>            |              |
| Risk of bias within studies   | If risk of bias assessment of individual studies was used in the meta-epidemiological analysis, report risk of bias indicators of each study to allow replication of findings                                       | Yes                                 | No                       | N/A                                 |              |
|                               |                                                                                                                                                                                                                     | <input type="checkbox"/>            | <input type="checkbox"/> | <input checked="" type="checkbox"/> |              |
| Results of individual studies | Present data elements used in the meta-epidemiological analysis from each study (results of clinical outcomes may not be relevant)                                                                                  | Yes                                 | No                       | N/A                                 | - Supplement |
|                               |                                                                                                                                                                                                                     | <input checked="" type="checkbox"/> | <input type="checkbox"/> | <input type="checkbox"/>            |              |
| Synthesis of results          | Present results of statistical analysis done, including measures of precision and measures of consistency. Present validity of assumptions and fit of statistical or simulation modelling, if applicable            | Yes                                 | No                       | N/A                                 | - Page 11    |
|                               |                                                                                                                                                                                                                     | <input checked="" type="checkbox"/> | <input type="checkbox"/> | <input type="checkbox"/>            |              |
| Additional analysis           | Give results of additional analyses, if done (eg, sensitivity or subgroup analyses, metaregression)                                                                                                                 | Yes                                 | No                       | N/A                                 | - Page 16    |
|                               |                                                                                                                                                                                                                     | <input checked="" type="checkbox"/> | <input type="checkbox"/> | <input type="checkbox"/>            |              |
| <b>Discussion</b>             |                                                                                                                                                                                                                     |                                     |                          |                                     |              |
| Summary of evidence           | Summarise the main findings and compare them with existing knowledge about the topic. The quality of evidence may not be relevant; however, investigators should describe their certainty in the results to readers | Yes                                 | No                       | N/A                                 | - Page 17    |
|                               |                                                                                                                                                                                                                     | <input checked="" type="checkbox"/> | <input type="checkbox"/> | <input type="checkbox"/>            |              |
| Limitations                   | Discuss limitations at research methodology level (eg, likelihood of reporting or publication bias)                                                                                                                 | Yes                                 | No                       | N/A                                 | - Page 19    |
|                               |                                                                                                                                                                                                                     | <input checked="" type="checkbox"/> | <input type="checkbox"/> | <input type="checkbox"/>            |              |
| Conclusions                   | Provide general interpretation of the results and implications for future research. Provide any plausible impact on clinical practice                                                                               | Yes                                 | No                       | N/A                                 | - Page 20    |
|                               |                                                                                                                                                                                                                     | <input checked="" type="checkbox"/> | <input type="checkbox"/> | <input type="checkbox"/>            |              |
| <b>Funding</b>                |                                                                                                                                                                                                                     |                                     |                          |                                     |              |
| Funding                       | Describe sources of funding for the methodology research and role of funders                                                                                                                                        | Yes                                 | No                       | N/A                                 | - Page 2     |
|                               |                                                                                                                                                                                                                     | <input checked="" type="checkbox"/> | <input type="checkbox"/> | <input type="checkbox"/>            |              |

Adapted from Murad and Wang (2017) (<https://ebm.bmj.com/content/ebmed/22/4/139.full.pdf>).
